# Supplementary material for: Preparation, photo-induced deformation behavior and application of hydrogen-bonded crosslinked liquid crystalline elastomers based on α-cyanostilbene
Source: Royal Society of Chemistry journal article supplement (doi:10.1039/d0py01060j), 2020-01-01
Supplement: d0py01060j1.pdf [file d0py01060j1.pdf]

## Electronic Supplementary Information

### Preparation, Photo-induced Deformation Behavior and Application of Hydrogen-bonded Crosslinked Liquid Crystalline Elastomers

#### Based on $\alpha$ -Cyanostilbene

Zui Liu<sup>†</sup>, Junqiu Liao<sup>†</sup>, Lifang He, Qin Gui, Yongjie Yuan\*, Hailiang Zhang\*

Key Laboratory of Polymeric Materials and Application Technology of Hunan Province, Key Laboratory of Advanced Functional Polymer Materials of Colleges and Universities of Hunan Province, College of Chemistry, Xiangtan University, Xiangtan 411105, Hunan Province, China.

\* Corresponding author

E-mail: hailiangzhang@xtu.edu.cn; yuanyongjie@xtu.edu.cn

<sup>†</sup>These authors contributed equally.

The nuclear magnetic data for monomers are listed as follows.

**M0CS12** <sup>1</sup>H NMR (400 MHz, CDCl<sub>3</sub>)  $\delta$  7.87 (d,  $J$  = 8.8 Hz, 2H, Ar-**H**), 7.67 (d,  $J$  = 8.7 Hz, 2H, Ar-**H**), 7.43 (s, 1H, -C=C-**H**), 7.20 (d,  $J$  = 8.7 Hz, 2H, Ar-**H**), 6.96 (d,  $J$  = 8.8 Hz, 2H, Ar-**H**), 6.37 (s, 1H, -C=C-**H**), 5.79 (s, 1H, -C=C-**H**), 4.01 (t,  $J$  = 6.5 Hz, 2H, -O**CH**<sub>2</sub>-), 2.07 (s, 3H, -C=C-**CH**<sub>3</sub>), 1.87 – 1.70 (m, 2H, -**CH**<sub>2</sub>-), 1.45 (dd,  $J$  = 15.1, 7.1 Hz, 2H, -**CH**<sub>2</sub>-), 1.29 (d,  $J$  = 21.9 Hz, 16H, -**CH**<sub>2</sub>-), 0.88 (t,  $J$  = 6.8 Hz, 3H, -**CH**<sub>2</sub>-). <sup>13</sup>C NMR (400 MHz, CDCl<sub>3</sub>)  $\delta$  166.30, 162.36, 151.68, 142.60, 133.90, 132.45, 129.19, 127.81, 126.65, 125.38, 121.39, 121.16, 114.61, 108.47, 69.66, 31.73, 29.10, 28.80, 26.58, 23.16, 19.10, 14.00. Mass Spectrometry (MS) (m/z) [M] Calcd for C<sub>31</sub>H<sub>39</sub>NO<sub>3</sub>, 473.57; found, 473.29.

**M2CS12** <sup>1</sup>H NMR (400 MHz, CDCl<sub>3</sub>)  $\delta$  7.85 (d,  $J$  = 8.7 Hz, 2H, Ar-**H**), 7.59 (d,  $J$  = 8.8 Hz, 2H, Ar-**H**), 7.35 (s, 1H, -C=C-**H**), 6.96 (dd,  $J$  = 8.4, 7.1 Hz, 4H, Ar-**H**), 6.16 (s, 1H, -C=C-**H**), 5.61 (s, 1H, -C=C-**H**), 4.52 (t, 2H, -O**CH**<sub>2</sub>-), 4.27 (t, 2H, -O**CH**<sub>2</sub>-), 4.01 (t,  $J$  = 6.5 Hz, 2H, -O**CH**<sub>2</sub>-), 1.96 (s, 3H, -C=C-**CH**<sub>3</sub>), 1.87 – 1.70 (m, 2H, -**CH**<sub>2</sub>-), 1.54 – 1.40 (m, 2H, -**CH**<sub>2</sub>-), 1.41 – 1.06 (m, 16H, -**CH**<sub>2</sub>-), 0.88 (t,  $J$  = 6.8 Hz, 3H, -**CH**<sub>3</sub>). <sup>13</sup>C NMR (400 MHz, CDCl<sub>3</sub>)  $\delta$  167.15, 162.36, 158.57, 142.60, 137.72, 132.45,

128.37, 127.81, 125.31, 124.72, 121.16, 116.15, 114.61, 108.47, 69.66, 67.38, 62.34, 31.73, 29.10, 28.80, 26.58, 23.16, 19.10, 14.00. Mass Spectrometry (MS) (m/z) [M] Calcd for C<sub>33</sub>H<sub>43</sub>NO<sub>4</sub>, 517.70; found, 517.38.

**M4CS12** <sup>1</sup>H NMR (400 MHz, CDCl<sub>3</sub>) δ 7.83 (d, *J* = 8.8 Hz, 2H, Ar-**H**), 7.56 (d, *J* = 8.9 Hz, 2H, Ar-**H**), 7.34 (s, 1H, -C=C-**H**), 6.94 (dd, *J* = 8.8, 7.5 Hz, 4H, Ar-**H**), 6.11 (s, 1H, -C=C-**H**), 5.56 (s, 1H, -C=C-**H**), 4.23 (t, *J* = 5.9 Hz, 2H, -OCH<sub>2</sub>-), 4.01 (dd, *J* = 13.4, 6.6 Hz, 4H, -OCH<sub>2</sub>-), 1.95 (s, 3H, -C=C-CH<sub>3</sub>), 1.84 – 1.67 (m, 4H, -CH<sub>2</sub>-), 1.45 (dd, *J* = 14.9, 7.2 Hz, 2H, -CH<sub>2</sub>-), 1.29 (d, *J* = 21.9 Hz, 16H, -CH<sub>2</sub>-), 0.87 (t, *J* = 6.8 Hz, 3H, -CH<sub>3</sub>). <sup>13</sup>C NMR (400 MHz, CDCl<sub>3</sub>) δ 167.15, 162.36, 158.57, 142.60, 137.72, 132.45, 128.37, 127.81, 125.31, 124.72, 121.16, 116.15, 114.61, 108.47, 69.66, 66.85, 31.73, 29.10, 28.80, 27.43, 26.93, 26.58, 23.16, 19.10, 14.00. Mass Spectrometry (MS) (m/z) [M] Calcd for C<sub>35</sub>H<sub>47</sub>NO<sub>4</sub>, 545.57; found, 545.35.

**M6CS12** <sup>1</sup>H NMR (400 MHz, CDCl<sub>3</sub>) δ 7.83 (d, *J* = 8.8 Hz, 2H, Ar-**H**), 7.56 (d, *J* = 8.9 Hz, 2H, Ar-**H**), 7.34 (s, 1H, -C=C-**H**), 6.94 (dd, *J* = 8.8, 7.5 Hz, 4H, Ar-**H**), 6.11 (s, 1H, -C=C-**H**), 5.56 (s, 1H, -C=C-**H**), 4.23 (t, *J* = 5.9 Hz, 2H, -OCH<sub>2</sub>-), 4.01 (dd, *J* = 13.4, 6.6 Hz, 4H, -OCH<sub>2</sub>-), 1.95 (s, 3H, -C=C-CH<sub>3</sub>), 1.84 – 1.67 (m, 2H, -CH<sub>2</sub>-), 1.45 (dd, *J* = 14.9, 7.2 Hz, 6H, -CH<sub>2</sub>-), 1.29 (d, *J* = 21.9 Hz, 16H, -CH<sub>2</sub>-), 0.87 (t, *J* = 6.8 Hz, 3H, -CH<sub>3</sub>). <sup>13</sup>C NMR (400 MHz, CDCl<sub>3</sub>) δ 167.15, 162.36, 158.57, 142.60, 137.72, 132.45, 128.37, 127.81, 125.31, 124.72, 121.16, 116.15, 114.61, 108.47, 69.66, 66.85, 31.73, 29.32, 29.10, 28.80, 26.58, 23.16, 19.10, 14.00. Mass Spectrometry (MS) (m/z) [M] Calcd for C<sub>37</sub>H<sub>51</sub>NO<sub>4</sub>, 573.18; found, 573.38.

**M8CS12** <sup>1</sup>H NMR (400 MHz, CDCl<sub>3</sub>) δ 7.84 (d, *J* = 8.8 Hz, 2H, Ar-**H**), 7.57 (d, *J* = 8.8 Hz, 2H, Ar-**H**), 7.35 (s, 1H, -C=C-**H**), 6.94 (dd, *J* = 8.7, 6.9 Hz, 4H, Ar-**H**), 6.10 (s, 1H, -C=C-**H**), 5.55 (s, 1H, -C=C-**H**), 4.15 (t, *J* = 6.7 Hz, 2H, -OCH<sub>2</sub>-), 4.00 (dd, *J* = 14.4, 6.7 Hz, 4H, -OCH<sub>2</sub>-), 1.95 (s, 3H, -C=C-CH<sub>3</sub>), 1.86 – 1.74 (m, 4H, -CH<sub>2</sub>-), 1.68 (dd, *J* = 13.6, 6.8 Hz, 2H, -CH<sub>2</sub>-), 1.52 – 1.42 (m, 4H, -CH<sub>2</sub>-), 1.38 (s, 6H, -CH<sub>2</sub>-), 1.29 (d, *J* = 22.5 Hz, 16H, -CH<sub>2</sub>-), 0.88 (t, *J* = 6.8 Hz, 3H, -CH<sub>3</sub>). <sup>13</sup>C NMR (400 MHz, CDCl<sub>3</sub>) δ 167.15, 162.36, 158.57, 142.60, 137.72, 132.45, 128.37, 127.81,

125.31, 124.72, 121.16, 116.15, 114.61, 108.47, 69.66, 66.85, 31.73, 29.32, 29.10, 28.80, 26.58, 23.16, 19.10, 14.00. Mass Spectrometry (MS) (m/z) [M] Calcd for C<sub>39</sub>H<sub>55</sub>NO<sub>4</sub>, 601.86; found, 601.41.

**M10CS12** <sup>1</sup>H NMR (400 MHz, CDCl<sub>3</sub>) δ 7.84 (d, *J* = 8.8 Hz, 2H, Ar-**H**), 7.57 (d, *J* = 8.8 Hz, 2H, Ar-**H**), 7.35 (s, 1H, -C=C-**H**), 6.94 (dd, *J* = 8.7, 6.4 Hz, 4H, Ar-**H**), 6.10 (s, 1H, -C=C-**H**), 5.55 (s, 1H, -C=C-**H**), 4.14 (t, *J* = 6.7 Hz, 2H, -OCH<sub>2</sub>-), 4.00 (dd, *J* = 14.9, 6.6 Hz, 4H, -OCH<sub>2</sub>-), 1.95 (s, 3H, -C=C-CH<sub>3</sub>), 1.79 (dd, *J* = 12.6, 6.4 Hz, 4H, -CH<sub>2</sub>-), 1.72 – 1.61 (m, 2H, -CH<sub>2</sub>-), 1.54 – 1.41 (m, 4H, -CH<sub>2</sub>-), 1.30 (d, *J* = 23.0 Hz, 26H, -CH<sub>2</sub>-), 0.88 (t, *J* = 6.8 Hz, 3H, -CH<sub>3</sub>). <sup>13</sup>C NMR (400 MHz, CDCl<sub>3</sub>) δ 167.15, 162.36, 158.57, 142.60, 137.72, 132.45, 128.37, 127.81, 125.31, 124.72, 121.16, 116.15, 114.61, 108.47, 69.66, 66.85, 31.73, 29.32, 29.10, 28.80, 26.58, 23.16, 19.10, 14.00. Mass Spectrometry (MS) (m/z) [M] Calcd for C<sub>41</sub>H<sub>59</sub>NO<sub>4</sub>, 629.91; found, 629.44.

**ME6UPy** <sup>1</sup>H NMR (400 MHz, CDCl<sub>3</sub>) δ 13.14 (s, 1H, -NH-), 11.87 (s, 1H, -NH-), 10.15 (s, 1H, -NH-), 6.13 (s, 1H, -C=C-**H**), 5.85 (s, 1H, -C=C-**H**), 5.59 (s, 1H, -C=C-**H**), 5.01 (s, 1H, -NH-), 4.32 (s, 4H, -OCH<sub>2</sub>-), 3.34 – 3.01 (m, 4H, NH-CH<sub>2</sub>-), 2.24 (s, 3H, -C=C-CH<sub>3</sub>), 1.95 (s, 3H, -C=C-CH<sub>3</sub>), 1.77 – 1.26 (m, 99, -CH<sub>2</sub>-). <sup>13</sup>C NMR (125 MHz, CDCl<sub>3</sub>) δ 167.16, 162.50, 158.13, 156.84, 156.45, 148.06, 137.72, 124.72, 111.57, 62.67, 60.77, 41.16, 40.10, 29.58, 27.49, 19.70, 19.10. Mass Spectrometry (MS) (m/z) [M] Calcd for C<sub>19</sub>H<sub>29</sub>N<sub>5</sub>O<sub>6</sub>, 423.46; found, 423.21.

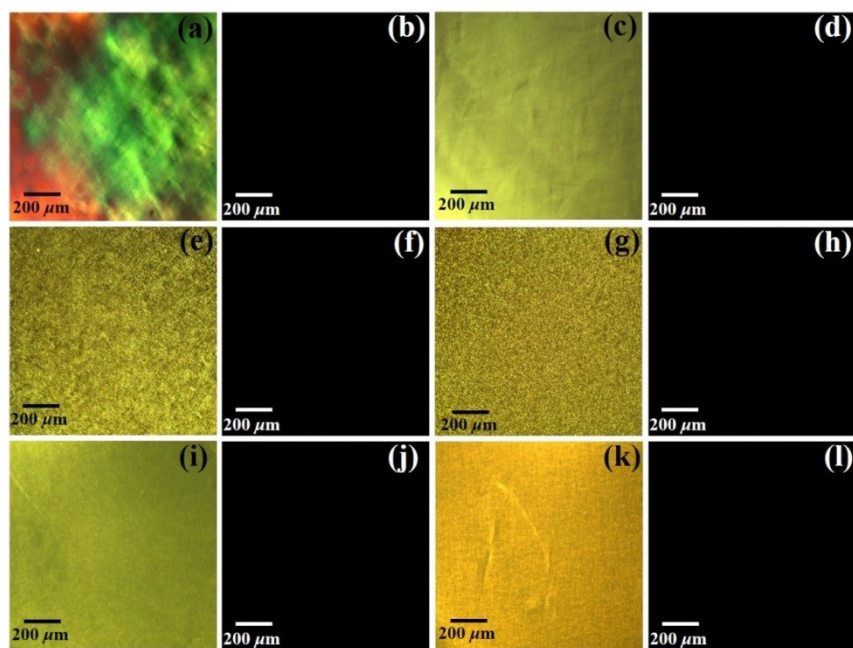

Fig. S1 POM photographs of LCE-0CS at 122°C (a) and 125°C (b), LCE-2CS at 102°C (c) and 105°C (d), LCE-4CS at 95°C (e) and 98°C (f), LCE-6CS at 82°C (g) and 85°C (h), LCE-8CS at 67°C (i) and 70°C (j), LCE-10CS at 71°C (k) and 74°C (l).

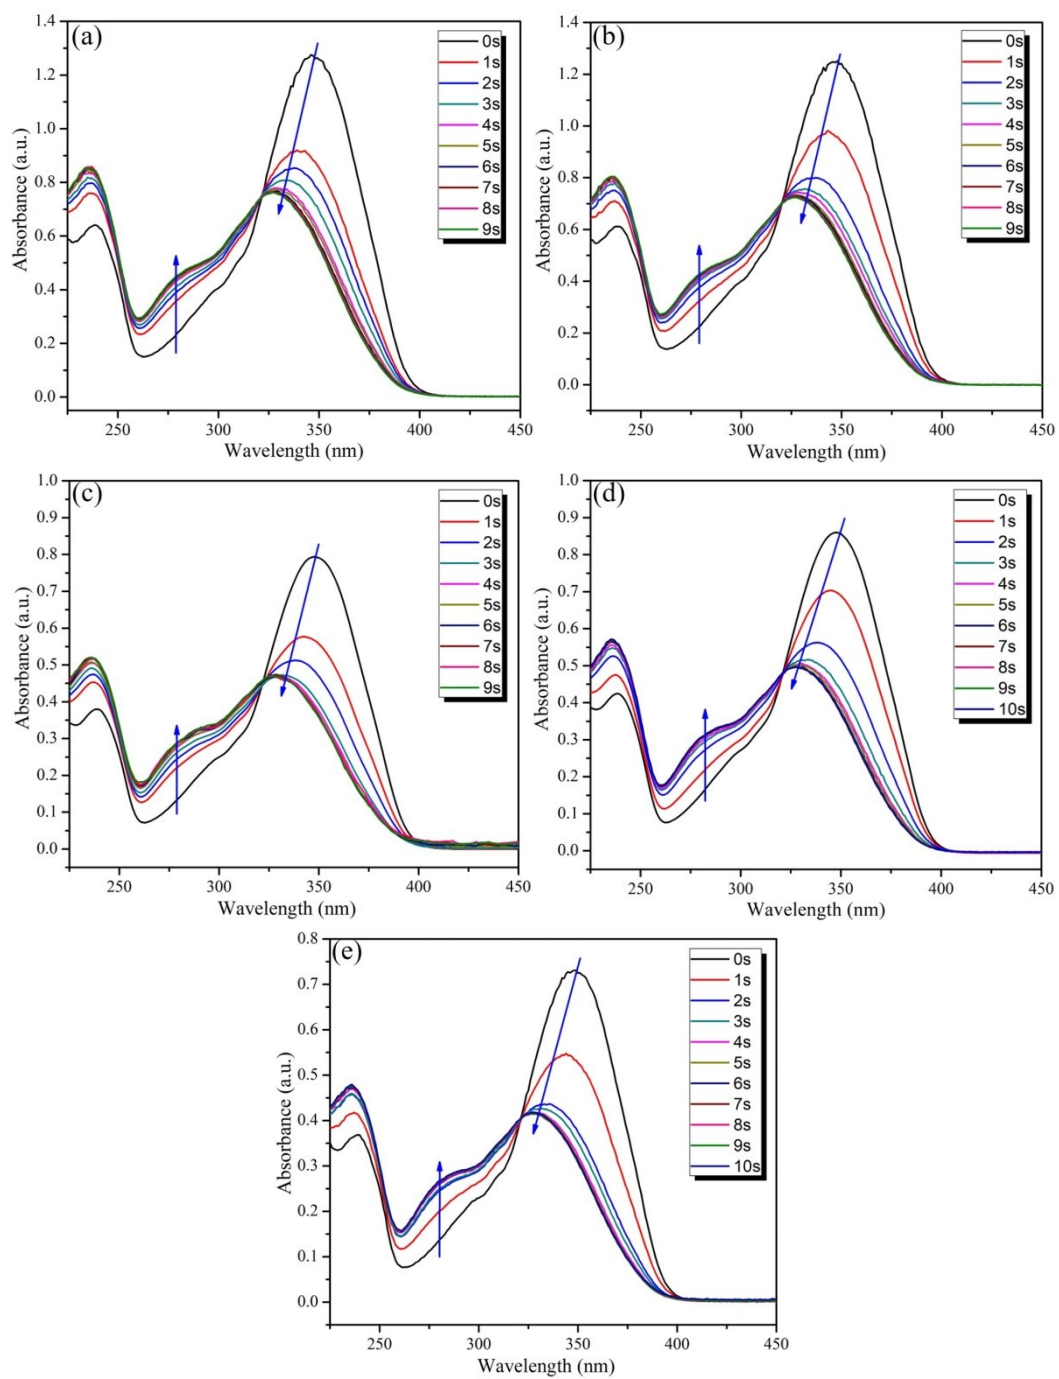

Fig. S2 UV-vis spectral changes in dependence of time for LCE-mCS dilute THF solution upon exposure to 365 nm UV light. (a) LCE-0CS, (b) LCE-2CS, (c) LCE-4CS, (d) LCE-6CS, (e) LCE-10CS.

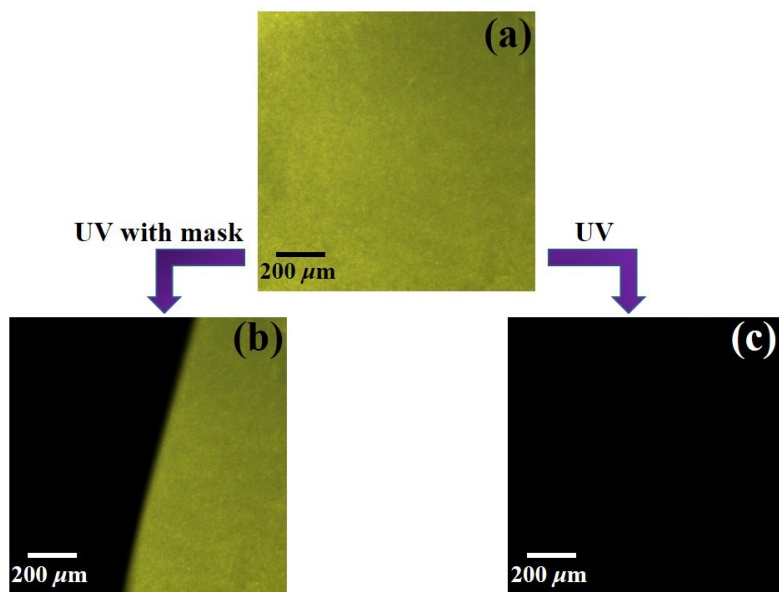

Fig. S3 POM images of LCE-8CS film taken at 25°C (a) and then irradiated with 365 nm UV light ( $120 \text{ mW cm}^{-2}$ ) for 30 min with (b) or without a mask (c).
